# Supplementary material
Source: Elsevier journal article supplement (https://www.sciencedirect.com/science/article/pii/S1885585716301840)
Supplement: mmc1 [file S1885585716301840:mmc1.pdf]

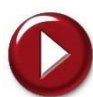

## **Supplementary material**

---

### **Comparison Between 3 Bleeding Scoring Systems in Nonvalvular Atrial Fibrillation Patients. What Can the New ORBIT Score Provide?**

---

Supplementary Table 1

Bleeding Risk Stratification With ORBIT Score

| ORBIT risk score                                                                                             | Score |
|--------------------------------------------------------------------------------------------------------------|-------|
| <u>O</u> lder than 74 y                                                                                      | 1     |
| <u>R</u> educed hemoglobin [less than 13 g/dL and 12 g/dL in men and women, respectively]                    | 2     |
| <u>B</u> leeding history                                                                                     | 2     |
| <u>I</u> nsufficient kidney function [estimated glomerular filtration rate < 60 mL/min/1.73 m <sup>2</sup> ] | 1     |
| <u>T</u> reatment with antiplatelets                                                                         | 1     |
| Maximum score                                                                                                | 7     |

## Supplementary Table 2

## Bleeding Risk Stratification With HAS-BLED and ATRIA

| HAS-BLED risk factor                                                                                 | Score  | ATRIA bleeding risk factor                                                                    | Score |
|------------------------------------------------------------------------------------------------------|--------|-----------------------------------------------------------------------------------------------|-------|
| Hypertension (systolic blood pressure > 160mm Hg)                                                    | 1      | Anemia (ie, hemoglobin < 13 g/dL in men and < 12 g/dL in women and/or thrombocytopenia)       | 3     |
| Abnormal renal and/or liver function                                                                 | 1 or 2 | Severe renal disease (estimated glomerular filtration rate < 30 mL/min or dialysis dependent) | 3     |
| Stroke                                                                                               | 1      | Age ≥75 y                                                                                     | 2     |
| Bleeding tendency or predisposition                                                                  | 1      | Prior hemorrhage                                                                              | 1     |
| Labile international normalized ratios                                                               | 1      | Hypertension                                                                                  | 1     |
| Elderly (eg, age > 65 y, frail condition)                                                            | 1      |                                                                                               |       |
| Drugs (eg, concomitant antiplatelet or Nonsteroidal anti-inflammatory drugs) or alcohol excess/abuse | 1 or 2 |                                                                                               |       |
| Maximum score                                                                                        | 9      |                                                                                               | 10    |
